# Supplementary material
Source: publisher figshare collection journal article supplement (https://future-science-group.figshare.com/articles/dataset/_/21205739)
Supplement: Supplementary file 1 [file 1]

| id       | HR        | HR. 95L   | HR. 95H   | pvalue    | km        |
|----------|-----------|-----------|-----------|-----------|-----------|
| ACTB     | 1.2718699 | 0.9152681 | 1.7674089 | 0.1519852 | 0.0312595 |
| ACTL6A   | 0.8691436 | 0.6761292 | 1.1172577 | 0.2736946 | 0.004766  |
| ACTL6B   | 1.0938502 | 0.7744779 | 1.5449223 | 0.6106025 | 0.0001933 |
| ACTR2    | 0.7996453 | 0.6701251 | 0.954199  | 0.0131389 | 2.84E-05  |
| ACTR3    | 0.8279181 | 0.6486421 | 1.0567435 | 0.1293459 | 0.0001309 |
| ACTR3B   | 0.8054171 | 0.5593488 | 1.1597357 | 0.2447054 | 0.0396651 |
| ACTR5    | 1.032035  | 0.7310785 | 1.4568835 | 0.8577341 | 0.0333712 |
| ACTR6    | 0.6827597 | 0.5393849 | 0.8642452 | 0.0015081 | 1.55E-06  |
| ACTR8    | 0.5854236 | 0.4547953 | 0.7535715 | 3.24E-05  | 1.71E-06  |
| ADNP     | 0.7283474 | 0.5576998 | 0.9512104 | 0.0199544 | 9.80E-05  |
| AEBP2    | 0.7306409 | 0.5727072 | 0.9321274 | 0.0115503 | 0.0009023 |
| AHCTF1   | 0.8225747 | 0.663097  | 1.0204075 | 0.075693  | 0.0028516 |
| AICDA    | 1.1595001 | 0.9697639 | 1.3863586 | 0.1045457 | 0.0250486 |
| AIRE     | 1.7706672 | 1.0761633 | 2.9133705 | 0.0245203 | 0.0001189 |
| AKAP1    | 0.6172778 | 0.4913309 | 0.7755096 | 3.42E-05  | 5.42E-06  |
| ALKBH1   | 0.5882948 | 0.4539022 | 0.7624786 | 6.09E-05  | 6.56E-05  |
| ALKBH3   | 0.8661267 | 0.6308079 | 1.1892297 | 0.3742499 | 0.0055741 |
| ANP32A   | 0.7707751 | 0.5579726 | 1.0647372 | 0.1142369 | 0.0071561 |
| ANP32B   | 0.8053013 | 0.6231343 | 1.0407229 | 0.0979433 | 0.0003676 |
| ANP32E   | 0.8571433 | 0.708019  | 1.0376765 | 0.1139431 | 0.0033214 |
| APBB1    | 0.6370729 | 0.5347635 | 0.7589557 | 4.47E-07  | 8.91E-10  |
| APEX1    | 0.6845017 | 0.5409892 | 0.8660849 | 0.0015909 | 0.00021   |
| APOBEC1  | 1.03237   | 0.4859185 | 2.1933466 | 0.9339651 | 8.50E-06  |
| APOBEC2  | 0.9444694 | 0.6803765 | 1.3110717 | 0.7327901 | 0.1357898 |
| APOBEC3A | 1.1652589 | 0.9284664 | 1.462442  | 0.1869726 | 0.0078677 |
| APOBEC3B | 1.2702138 | 1.0280799 | 1.5693752 | 0.0266502 | 0.0018216 |
| APOBEC3C | 1.12436   | 0.9723397 | 1.300148  | 0.1137636 | 0.0049712 |
| APOBEC3D | 1.3174694 | 1.093483  | 1.5873367 | 0.0037324 | 0.0004336 |
| APOBEC3F | 0.9273392 | 0.7285501 | 1.1803689 | 0.5399929 | 0.0175831 |
| APOBEC3G | 1.1693791 | 0.9939447 | 1.3757783 | 0.059197  | 0.0357108 |
| ARID1A   | 0.7771978 | 0.642768  | 0.9397424 | 0.0092851 | 6.55E-05  |
| ARID1B   | 0.6711314 | 0.5406958 | 0.833033  | 0.0002983 | 6.01E-07  |
| ARID2    | 0.7854154 | 0.6171772 | 0.999514  | 0.0495398 | 0.0048766 |
| ARID3A   | 1.3004205 | 1.0086661 | 1.6765642 | 0.0427103 | 0.0125172 |
| ARID3B   | 0.8440999 | 0.6203174 | 1.1486131 | 0.2808648 | 0.0204898 |
| ARID4A   | 0.7208126 | 0.5988597 | 0.8676001 | 0.0005366 | 6.72E-05  |
| ARID4B   | 0.799953  | 0.6438822 | 0.9938539 | 0.0438378 | 0.000347  |
| ARID5A   | 1.14233   | 0.9418095 | 1.3855431 | 0.1766301 | 0.0250451 |
| ARID5B   | 0.7832939 | 0.690943  | 0.8879883 | 0.0001356 | 2.27E-08  |
| ARNTL    | 0.8560328 | 0.6931507 | 1.0571902 | 0.1488759 | 0.0014771 |
| ARRB1    | 0.6940639 | 0.5824545 | 0.8270598 | 4.45E-05  | 2.31E-06  |
| ASCL1    | 1.3822829 | 0.9338967 | 2.0459501 | 0.105634  | 0.0020137 |
| ASCL2    | 1.1932752 | 0.9647368 | 1.4759525 | 0.1033121 | 0.0103443 |
| ASF1A    | 0.7564957 | 0.5907874 | 0.9686831 | 0.0269532 | 0.0001915 |
| ASF1B    | 1.2711565 | 1.0424319 | 1.5500665 | 0.0177615 | 3.79E-05  |
| ASH1L    | 0.7413753 | 0.6369887 | 0.8628682 | 0.0001111 | 2.22E-06  |
| ASH2L    | 0.6026318 | 0.4762581 | 0.7625383 | 2.47E-05  | 1.99E-06  |
| ASXL1    | 1.0420824 | 0.7930355 | 1.3693408 | 0.7673651 | 0.3253534 |
| ASXL2    | 0.6805325 | 0.5678156 | 0.8156248 | 3.10E-05  | 3.60E-06  |
| ATAD2    | 1.2399237 | 0.9903862 | 1.5523347 | 0.0606958 | 0.0305287 |

|          |           |           |           |           |           |
|----------|-----------|-----------|-----------|-----------|-----------|
| ATF2     | 0.7226323 | 0.5795841 | 0.9009866 | 0.0038971 | 2.49E-05  |
| ATF7IP   | 0.8389631 | 0.6656455 | 1.0574084 | 0.1369678 | 0.0029143 |
| ATM      | 0.8760672 | 0.7306262 | 1.0504601 | 0.1531532 | 0.0257563 |
| ATN1     | 1.0810297 | 0.8475096 | 1.3788932 | 0.5303429 | 0.1528082 |
| ATR      | 0.9364974 | 0.7235214 | 1.212165  | 0.618216  | 0.0710416 |
| ATRX     | 0.6687265 | 0.547173  | 0.8172828 | 8.45E-05  | 2.20E-05  |
| ATXN7    | 0.8207144 | 0.6554275 | 1.0276836 | 0.0850746 | 0.0070421 |
| ATXN7L3  | 1.2635482 | 0.9249444 | 1.7261081 | 0.1416291 | 0.0372721 |
| AURKA    | 1.5619149 | 1.2850779 | 1.8983895 | 7.47E-06  | 1.65E-08  |
| AURKB    | 1.6576906 | 1.4417559 | 1.9059664 | 1.27E-12  | 3.91E-09  |
| AURKC    | 1.4709431 | 1.1306422 | 1.9136679 | 0.0040455 | 2.58E-05  |
| BAHD1    | 0.617199  | 0.4928191 | 0.7729706 | 2.64E-05  | 4.23E-07  |
| BANF1    | 1.8838051 | 1.3709452 | 2.5885218 | 9.39E-05  | 3.01E-06  |
| BANP     | 0.7527607 | 0.5246719 | 1.0800056 | 0.123058  | 0.0125776 |
| BAP1     | 0.7058375 | 0.5375908 | 0.9267394 | 0.0121547 | 0.0003036 |
| BARD1    | 0.9504613 | 0.7326444 | 1.2330355 | 0.7020282 | 0.0571425 |
| BAZ1A    | 1.0746453 | 0.8629753 | 1.3382335 | 0.5200742 | 0.1073966 |
| BAZ1B    | 0.8022653 | 0.6502958 | 0.9897491 | 0.0397704 | 0.0007433 |
| BAZ2A    | 0.8710115 | 0.7187528 | 1.0555244 | 0.1589136 | 0.0081067 |
| BAZ2B    | 0.7997506 | 0.648352  | 0.9865027 | 0.0368994 | 0.0005879 |
| BBX      | 0.7042825 | 0.592571  | 0.8370537 | 6.94E-05  | 3.43E-06  |
| BCL10    | 0.6290642 | 0.5082001 | 0.778673  | 2.06E-05  | 3.04E-08  |
| BCOR     | 0.7842488 | 0.6566829 | 0.9365952 | 0.007293  | 8.52E-05  |
| BCORL1   | 0.7903472 | 0.6348401 | 0.9839465 | 0.0353143 | 0.0004944 |
| BMI1     | 0.6704792 | 0.5393381 | 0.8335074 | 0.0003183 | 3.75E-05  |
| BRCA1    | 0.979343  | 0.7509851 | 1.2771395 | 0.8775367 | 0.0053015 |
| BRCA2    | 0.8750842 | 0.6387929 | 1.1987804 | 0.4060108 | 0.0016833 |
| BRCC3    | 0.7332617 | 0.5795242 | 0.9277831 | 0.0097564 | 0.001187  |
| BRD1     | 0.8623873 | 0.67955   | 1.0944182 | 0.2232928 | 0.0311734 |
| BRD2     | 0.7736097 | 0.6360046 | 0.9409867 | 0.0102097 | 0.0008484 |
| BRD3     | 0.6923693 | 0.5647547 | 0.8488203 | 0.0004049 | 8.28E-05  |
| BRD4     | 1.1109158 | 0.8203378 | 1.5044217 | 0.4965754 | 0.06794   |
| BRD7     | 0.6464752 | 0.4751469 | 0.8795811 | 0.0054914 | 0.0013236 |
| BRD8     | 0.8876471 | 0.7026561 | 1.1213414 | 0.3175511 | 0.0246673 |
| BRD9     | 1.6614549 | 1.1492294 | 2.4019855 | 0.0069432 | 0.0002188 |
| BRDT     | 0.9899601 | 0.4619887 | 2.1213096 | 0.9792971 | 4.10E-05  |
| BRMS1    | 1.079393  | 0.7391277 | 1.5763031 | 0.6925329 | 0.0278302 |
| BRMS1L   | 0.5833034 | 0.4748023 | 0.716599  | 2.84E-07  | 2.29E-08  |
| BRPF1    | 0.8078327 | 0.6245198 | 1.0449528 | 0.1041399 | 0.0013298 |
| BRPF3    | 0.7603267 | 0.6435163 | 0.8983404 | 0.0012834 | 9.13E-05  |
| BRWD1    | 0.8714071 | 0.6758104 | 1.1236143 | 0.2885492 | 0.0233824 |
| BRWD3    | 0.7521686 | 0.6118603 | 0.9246515 | 0.0068581 | 0.0006267 |
| BTAF1    | 1.0395726 | 0.8607366 | 1.2555655 | 0.6869921 | 0.1072989 |
| BUB1     | 1.5486342 | 1.3060941 | 1.8362138 | 4.84E-07  | 3.46E-07  |
| C17orf49 | 1.6826985 | 1.2003005 | 2.3589712 | 0.0025345 | 3.46E-05  |
| CBX1     | 0.7920477 | 0.6327032 | 0.9915227 | 0.0419264 | 0.0004461 |
| CBX2     | 1.0364661 | 0.7974097 | 1.3471895 | 0.7889068 | 0.2988345 |
| CBX3     | 0.9952762 | 0.7228017 | 1.3704653 | 0.9768552 | 0.0170019 |
| CBX4     | 1.3984886 | 1.0477709 | 1.8666011 | 0.0228018 | 0.0024924 |
| CBX5     | 0.8073145 | 0.6565249 | 0.9927371 | 0.0424516 | 0.0001455 |
| CBX6     | 0.7595575 | 0.6314835 | 0.9136068 | 0.003512  | 0.000283  |

|         |           |           |           |           |           |
|---------|-----------|-----------|-----------|-----------|-----------|
| CBX7    | 0.6738089 | 0.5727928 | 0.79264   | 1.90E-06  | 6.01E-06  |
| CBX8    | 1.844397  | 1.3627905 | 2.4962019 | 7.35E-05  | 2.22E-05  |
| CDC6    | 1.4212163 | 1.1456704 | 1.763034  | 0.0013903 | 3.85E-05  |
| CDC73   | 0.6822454 | 0.573093  | 0.8121871 | 1.72E-05  | 1.33E-06  |
| CDK2    | 1.2476425 | 0.951459  | 1.6360261 | 0.1095739 | 0.0349993 |
| CDK3    | 1.6795129 | 1.3102033 | 2.1529204 | 4.27E-05  | 2.09E-05  |
| CDK5    | 1.1903657 | 0.8753814 | 1.6186892 | 0.266468  | 0.000623  |
| CDK7    | 0.9064992 | 0.6806224 | 1.2073373 | 0.5019911 | 0.012028  |
| CDK9    | 1.2549185 | 0.8721257 | 1.8057264 | 0.2213194 | 0.0039857 |
| CDYL    | 0.7019453 | 0.5576419 | 0.8835908 | 0.0025785 | 2.76E-05  |
| CDYL2   | 0.7758056 | 0.6617505 | 0.9095185 | 0.0017544 | 0.0001172 |
| CECR2   | 1.178857  | 0.8688244 | 1.5995222 | 0.2905876 | 0.0013419 |
| CHAF1A  | 0.9342208 | 0.7197627 | 1.2125782 | 0.6090922 | 0.0436956 |
| CHAF1B  | 1.2877933 | 1.0223922 | 1.6220895 | 0.031711  | 0.0013342 |
| CHD1    | 0.8649079 | 0.7040749 | 1.0624801 | 0.166787  | 0.0161685 |
| CHD1L   | 1.1592529 | 0.9358483 | 1.4359883 | 0.1760734 | 0.0015971 |
| CHD2    | 0.8498641 | 0.6856459 | 1.0534141 | 0.137553  | 0.0014464 |
| CHD3    | 1.0061792 | 0.8462218 | 1.1963726 | 0.9444037 | 0.0995562 |
| CHD4    | 0.8234336 | 0.6516999 | 1.0404221 | 0.1035435 | 0.0035831 |
| CHD5    | 0.9514154 | 0.6727675 | 1.345474  | 0.7781919 | 0.0137367 |
| CHD6    | 0.7430619 | 0.6021491 | 0.9169506 | 0.0056382 | 2.75E-05  |
| CHD7    | 0.9546885 | 0.7380315 | 1.2349475 | 0.7240238 | 0.0073206 |
| CHD8    | 0.7393503 | 0.6116984 | 0.8936411 | 0.0017912 | 6.94E-05  |
| CHD9    | 0.7053096 | 0.5873208 | 0.8470015 | 0.0001857 | 1.42E-06  |
| CHEK1   | 1.2075717 | 0.931193  | 1.5659797 | 0.1549217 | 0.0011719 |
| CHMP1B  | 0.5915235 | 0.4786717 | 0.7309814 | 1.17E-06  | 1.37E-08  |
| CHRA1   | 0.7690517 | 0.5510562 | 1.0732853 | 0.1225647 | 0.0183713 |
| CHUK    | 0.6397271 | 0.5108636 | 0.8010958 | 9.93E-05  | 7.72E-07  |
| CIC     | 0.8799436 | 0.7092965 | 1.0916461 | 0.2449237 | 0.0177357 |
| CIT     | 0.9045158 | 0.811068  | 1.0087302 | 0.0712732 | 0.0004429 |
| CLNS1A  | 0.705373  | 0.5125441 | 0.9707478 | 0.0321791 | 8.11E-05  |
| CLOCK   | 0.6920137 | 0.5672695 | 0.8441895 | 0.0002833 | 3.95E-05  |
| CRB2    | 1.1002928 | 0.9405644 | 1.2871465 | 0.2323645 | 0.0165091 |
| CREBBP  | 0.6605185 | 0.537701  | 0.8113891 | 7.78E-05  | 1.46E-06  |
| CSNK2A1 | 0.774882  | 0.5995273 | 1.0015259 | 0.0513771 | 0.003371  |
| CTBP1   | 1.2164563 | 0.8125705 | 1.8210925 | 0.3412071 | 0.0190925 |
| CTBP2   | 0.6085286 | 0.4922897 | 0.7522136 | 4.38E-06  | 6.68E-08  |
| CTCF    | 0.6533345 | 0.5237299 | 0.8150116 | 0.0001612 | 6.87E-07  |
| CTCF1   | 0.5262715 | 0.1271546 | 2.1781489 | 0.3757354 | 0.2361313 |
| CTR9    | 0.6292825 | 0.513811  | 0.7707044 | 7.53E-06  | 1.86E-08  |
| CUL1    | 0.7679607 | 0.5707963 | 1.0332295 | 0.0811544 | 0.0001806 |
| CUL2    | 0.8097235 | 0.6193656 | 1.0585865 | 0.1226901 | 8.07E-05  |
| CUL3    | 0.6756246 | 0.550678  | 0.8289212 | 0.000171  | 5.02E-06  |
| CUL4A   | 0.6996319 | 0.5480262 | 0.8931777 | 0.0041497 | 0.0001705 |
| CUL4B   | 0.7421807 | 0.5953969 | 0.9251513 | 0.0080037 | 0.0001749 |
| CUL5    | 0.6726174 | 0.55009   | 0.8224368 | 0.000111  | 0.0001385 |
| CXXC1   | 0.9230126 | 0.7513927 | 1.1338311 | 0.4452979 | 0.0286085 |
| DAPK3   | 1.1380697 | 0.8669188 | 1.49403   | 0.3516187 | 0.0293616 |
| DAXX    | 0.889139  | 0.6672808 | 1.1847608 | 0.4223698 | 0.0071841 |
| DBF4    | 1.5171025 | 1.1917445 | 1.9312865 | 0.0007136 | 3.02E-05  |
| DBF4B   | 1.502358  | 1.0948041 | 2.0616287 | 0.0117044 | 0.0046024 |

|         |           |           |           |           |           |
|---------|-----------|-----------|-----------|-----------|-----------|
| DDB1    | 0.5871986 | 0.4581037 | 0.7526727 | 2.63E-05  | 1.27E-05  |
| DDB2    | 0.8422162 | 0.6755218 | 1.0500449 | 0.1270091 | 0.0016165 |
| DDX21   | 0.8063061 | 0.6862605 | 0.947351  | 0.0088565 | 0.0004588 |
| DDX50   | 0.7366388 | 0.5975723 | 0.9080687 | 0.0041918 | 2.95E-05  |
| DEK     | 0.8025334 | 0.6730152 | 0.9569767 | 0.0142985 | 0.0001076 |
| DHX30   | 0.700147  | 0.5228726 | 0.9375244 | 0.0167087 | 0.0034833 |
| DID01   | 0.7640623 | 0.5883118 | 0.992316  | 0.0436118 | 0.0015134 |
| DMAP1   | 0.9743708 | 0.7329223 | 1.2953603 | 0.8581678 | 0.296567  |
| DNAJC1  | 0.6400081 | 0.5210221 | 0.7861671 | 2.11E-05  | 1.57E-06  |
| DNMT1   | 1.01205   | 0.8103957 | 1.2638829 | 0.9158605 | 0.0931951 |
| DNMT3A  | 1.0191312 | 0.7869557 | 1.3198055 | 0.8857647 | 0.0845915 |
| DNMT3B  | 1.5471291 | 1.2505369 | 1.9140646 | 5.85E-05  | 2.52E-06  |
| DNMT3L  | 1.3744139 | 0.7068053 | 2.6726078 | 0.3486104 | 2.41E-05  |
| DNTT    | 1.1962313 | 0.9220797 | 1.5518934 | 0.1772945 | 0.0019959 |
| DNTTIP2 | 0.6670791 | 0.5239416 | 0.8493209 | 0.0010189 | 3.11E-05  |
| DOT1L   | 1.0683124 | 0.8495818 | 1.3433567 | 0.5718416 | 0.1573775 |
| DPF1    | 1.596982  | 1.1942056 | 2.135605  | 0.0015948 | 2.52E-09  |
| DPF2    | 0.6476297 | 0.4759762 | 0.8811873 | 0.0056926 | 0.0049657 |
| DPF3    | 0.9074655 | 0.7794884 | 1.056454  | 0.2106041 | 0.0152433 |
| DPPA3   | 1.0249953 | 0.6694828 | 1.5692942 | 0.9095527 | 6.02E-05  |
| DR1     | 0.6833044 | 0.53596   | 0.8711561 | 0.0021189 | 1.78E-05  |
| DTX3L   | 0.7745308 | 0.6238659 | 0.9615817 | 0.0206178 | 0.00081   |
| DUSP1   | 0.7997587 | 0.7024693 | 0.9105222 | 0.0007345 | 9.90E-05  |
| DZIP3   | 0.7202656 | 0.61146   | 0.8484326 | 8.60E-05  | 2.15E-05  |
| E2F6    | 0.8943724 | 0.6464562 | 1.2373647 | 0.5003017 | 0.0134397 |
| EED     | 1.2106337 | 0.8084102 | 1.812983  | 0.35356   | 0.0485484 |
| EHMT1   | 0.8946978 | 0.6767458 | 1.1828431 | 0.4347263 | 0.0394762 |
| EHMT2   | 0.9974154 | 0.7732922 | 1.2864962 | 0.9840995 | 0.0471185 |
| ELP3    | 0.6145599 | 0.4807424 | 0.7856263 | 0.0001021 | 2.89E-06  |
| ELP4    | 0.6286601 | 0.5178559 | 0.7631728 | 2.71E-06  | 9.44E-07  |
| ENY2    | 0.8576661 | 0.6043279 | 1.2172054 | 0.3900263 | 0.0178167 |
| EP300   | 0.7392712 | 0.6251437 | 0.8742341 | 0.000414  | 1.76E-05  |
| EP400   | 0.9770749 | 0.7585628 | 1.2585319 | 0.857492  | 0.0603746 |
| EPC1    | 0.6770766 | 0.5367033 | 0.854164  | 0.0010029 | 8.27E-06  |
| EPC2    | 0.6966739 | 0.5759159 | 0.8427523 | 0.0001981 | 2.66E-05  |
| ERBB4   | 0.9521773 | 0.7887345 | 1.149489  | 0.6100435 | 0.0183794 |
| ERCC6   | 0.6595404 | 0.4837109 | 0.899284  | 0.0085131 | 4.08E-06  |
| EXOSC1  | 2.5754849 | 1.6813322 | 3.945159  | 1.37E-05  | 4.98E-09  |
| EXOSC2  | 0.6991516 | 0.5380903 | 0.9084218 | 0.0073864 | 0.000397  |
| EXOSC3  | 0.6768022 | 0.4981744 | 0.9194797 | 0.0125283 | 1.47E-05  |
| EXOSC4  | 1.1147225 | 0.8628338 | 1.4401454 | 0.405948  | 0.0195718 |
| EXOSC5  | 1.237536  | 0.9590715 | 1.5968521 | 0.1012856 | 0.0140237 |
| EXOSC6  | 0.8131535 | 0.5900981 | 1.1205232 | 0.2061044 | 0.0278623 |
| EXOSC7  | 1.0073735 | 0.7668549 | 1.3233291 | 0.9579067 | 0.1023017 |
| EXOSC8  | 1.2120172 | 0.8890462 | 1.6523164 | 0.2239296 | 0.0008938 |
| EXOSC9  | 0.8471465 | 0.5930604 | 1.2100913 | 0.3618819 | 0.0463317 |
| EYA1    | 1.3405154 | 1.1872932 | 1.5135111 | 2.22E-06  | 2.52E-10  |
| EYA2    | 1.0005847 | 0.8453145 | 1.1843754 | 0.9945795 | 0.0181948 |
| EYA3    | 0.6578694 | 0.5382906 | 0.8040121 | 4.29E-05  | 8.08E-06  |
| EYA4    | 0.77042   | 0.5779875 | 1.02692   | 0.0752731 | 0.0038536 |
| EZH1    | 0.7454787 | 0.5961274 | 0.9322477 | 0.010024  | 0.0011585 |

|         |           |           |           |           |           |
|---------|-----------|-----------|-----------|-----------|-----------|
| EZH2    | 1.5160014 | 1.2054213 | 1.9066033 | 0.0003747 | 6.72E-07  |
| FBL     | 1.0095051 | 0.7784631 | 1.3091187 | 0.9431246 | 0.0098909 |
| FBXL19  | 1.355126  | 1.0355532 | 1.7733192 | 0.026791  | 0.0019208 |
| FMR1    | 0.6639843 | 0.5208545 | 0.846446  | 0.0009472 | 1.21E-05  |
| FOXA1   | 1.2575614 | 1.0970697 | 1.4415317 | 0.0010023 | 2.50E-10  |
| FOXP1   | 0.9055283 | 0.7178949 | 1.1422026 | 0.4022222 | 0.0408532 |
| FOXP2   | 1.0700877 | 0.9198842 | 1.2448174 | 0.3800393 | 0.1352282 |
| FOXP3   | 1.3133845 | 1.1285141 | 1.5285398 | 0.0004284 | 3.20E-07  |
| FOXP4   | 1.2198763 | 0.9696425 | 1.5346876 | 0.0897386 | 0.0091687 |
| FTO     | 0.752521  | 0.6362622 | 0.8900228 | 0.000898  | 3.99E-06  |
| FXR1    | 0.8822918 | 0.6644228 | 1.1716015 | 0.3867802 | 0.0065741 |
| FXR2    | 0.7861919 | 0.5982811 | 1.0331224 | 0.0843223 | 0.0071454 |
| GABRG1  | 0.6981829 | 0.4554925 | 1.070181  | 0.0992084 | 0.0012133 |
| GADD45A | 0.7098598 | 0.6020637 | 0.8369562 | 4.54E-05  | 2.46E-05  |
| GADD45B | 1.081153  | 0.9327326 | 1.2531906 | 0.3003556 | 0.0873854 |
| GADD45G | 0.9587387 | 0.8293217 | 1.1083514 | 0.5690028 | 0.1560293 |
| GATAD1  | 1.038969  | 0.781694  | 1.3809197 | 0.7922845 | 0.0827227 |
| GATAD2A | 0.7725089 | 0.5840261 | 1.0218209 | 0.0704976 | 0.0039475 |
| GATAD2B | 0.7902843 | 0.6304494 | 0.9906415 | 0.041199  | 0.0016768 |
| GFI1    | 1.1567089 | 0.965741  | 1.3854392 | 0.113807  | 0.0172011 |
| GFI1B   | 0.5630089 | 0.2174951 | 1.4574078 | 0.2364982 | 0.0021938 |
| GLYATL1 | 0.853356  | 0.7890041 | 0.9229566 | 7.37E-05  | 4.90E-06  |
| GTF2I   | 0.7271984 | 0.6340914 | 0.8339768 | 5.19E-06  | 8.76E-06  |
| GTF3C1  | 0.8838577 | 0.6806975 | 1.1476528 | 0.3541978 | 0.0013374 |
| GTF3C4  | 0.6573552 | 0.5437877 | 0.7946407 | 1.46E-05  | 5.34E-07  |
| HAT1    | 0.7029677 | 0.5615305 | 0.8800299 | 0.0021052 | 3.96E-08  |
| HBP1    | 0.6274147 | 0.5392438 | 0.7300021 | 1.61E-09  | 1.90E-10  |
| HCFC1   | 0.8399525 | 0.6760056 | 1.0436603 | 0.1154314 | 0.0069719 |
| HCFC2   | 0.6438641 | 0.5205346 | 0.7964139 | 4.94E-05  | 4.20E-07  |
| HDAC1   | 0.9161241 | 0.707232  | 1.1867159 | 0.5070344 | 0.0612769 |
| HDAC10  | 1.8338896 | 1.4630939 | 2.2986569 | 1.43E-07  | 9.44E-10  |
| HDAC11  | 0.6159603 | 0.4769702 | 0.7954523 | 0.0002041 | 5.04E-06  |
| HDAC2   | 0.7378251 | 0.5882534 | 0.9254276 | 0.0085274 | 2.77E-05  |
| HDAC3   | 0.7750149 | 0.597995  | 1.0044366 | 0.0540416 | 0.0059105 |
| HDAC4   | 0.8303204 | 0.6289547 | 1.096155  | 0.1894814 | 0.0083355 |
| HDAC5   | 0.629432  | 0.5057863 | 0.7833044 | 3.34E-05  | 2.26E-06  |
| HDAC6   | 0.8036978 | 0.6458628 | 1.0001042 | 0.0501093 | 0.0007574 |
| HDAC8   | 1.0380545 | 0.6563087 | 1.6418449 | 0.8731461 | 0.0232094 |
| HDAC9   | 0.7208256 | 0.5506566 | 0.9435818 | 0.0171892 | 0.0041284 |
| HDGF    | 0.8920665 | 0.7228443 | 1.1009048 | 0.2872268 | 0.0102108 |
| HELLS   | 1.4330736 | 1.1021811 | 1.8633054 | 0.0072247 | 0.000299  |
| HIF1AN  | 0.6733686 | 0.5171232 | 0.8768225 | 0.0033266 | 1.05E-05  |
| HIRA    | 0.7840558 | 0.581987  | 1.0562838 | 0.1096289 | 0.0021472 |
| HIRIP3  | 0.7593525 | 0.5952052 | 0.9687687 | 0.0267398 | 0.0006597 |
| HLCS    | 0.7981986 | 0.6264054 | 1.0171066 | 0.0683348 | 0.0020427 |
| HMG20A  | 0.7237747 | 0.6025437 | 0.8693973 | 0.0005477 | 0.0001099 |
| HMG20B  | 0.8907708 | 0.6398455 | 1.2401005 | 0.4932184 | 0.0114805 |
| HMGA1   | 1.2811862 | 1.0972321 | 1.4959807 | 0.0017284 | 0.0059134 |
| HMGA2   | 1.4911019 | 1.3065491 | 1.7017231 | 3.10E-09  | 9.44E-08  |
| HMGB1   | 0.6804348 | 0.5162814 | 0.8967812 | 0.0062688 | 0.0017274 |
| HMGB2   | 1.2096881 | 0.9227614 | 1.5858327 | 0.168187  | 0.0006572 |

|          |           |           |           |           |           |
|----------|-----------|-----------|-----------|-----------|-----------|
| HMGB3    | 1.2759568 | 1.0753855 | 1.513937  | 0.0052236 | 0.0080688 |
| HMGN1    | 1.1452157 | 0.8507148 | 1.5416672 | 0.3713276 | 0.0124414 |
| HMGN2    | 0.7448604 | 0.6138417 | 0.9038439 | 0.0028432 | 0.0002699 |
| HMGN3    | 1.2565631 | 1.0145807 | 1.5562595 | 0.0363849 | 4.27E-05  |
| HMGN4    | 0.7608603 | 0.6484214 | 0.8927966 | 0.0008086 | 1.33E-05  |
| HP1BP3   | 0.8044158 | 0.6371815 | 1.0155424 | 0.0672105 | 0.0014315 |
| HR       | 0.7428662 | 0.5720166 | 0.964745  | 0.0258053 | 0.0001188 |
| HSPA1A   | 0.9005708 | 0.7407325 | 1.0948997 | 0.2934797 | 0.0117208 |
| HUWE1    | 0.756975  | 0.6363449 | 0.9004725 | 0.0016686 | 2.02E-05  |
| IDH1     | 0.9936717 | 0.8052608 | 1.226166  | 0.9528064 | 0.0004904 |
| IDH2     | 0.8105861 | 0.6430985 | 1.0216938 | 0.0753664 | 0.004684  |
| IFIT3    | 0.8172608 | 0.6887626 | 0.9697321 | 0.0207711 | 0.0008415 |
| IGFBP7   | 0.7954823 | 0.6693633 | 0.9453642 | 0.0093797 | 0.0001219 |
| ING1     | 0.7862468 | 0.5734856 | 1.0779417 | 0.1352358 | 0.0063618 |
| ING2     | 0.7068123 | 0.5489932 | 0.9099996 | 0.0071129 | 0.0012071 |
| ING3     | 0.6015308 | 0.4908041 | 0.7372378 | 9.73E-07  | 1.64E-06  |
| ING4     | 0.7575995 | 0.5741227 | 0.9997114 | 0.049762  | 0.0004578 |
| ING5     | 1.0474948 | 0.8110579 | 1.3528571 | 0.722209  | 0.2380817 |
| JAK2     | 0.7762495 | 0.6475879 | 0.9304734 | 0.0061562 | 0.0003223 |
| JARID2   | 0.7825564 | 0.6201307 | 0.987525  | 0.0388542 | 0.0067183 |
| JDP2     | 0.7897431 | 0.6609225 | 0.9436721 | 0.0093744 | 1.89E-05  |
| JMJD1C   | 0.7320207 | 0.620767  | 0.8632131 | 0.0002083 | 2.30E-05  |
| JMJD4    | 0.9624462 | 0.7018864 | 1.319733  | 0.812167  | 0.1102244 |
| KEAP1    | 0.70527   | 0.5211164 | 0.9545003 | 0.0237235 | 0.0001225 |
| L3MBTL2  | 0.6975914 | 0.5233227 | 0.9298924 | 0.014065  | 0.0001357 |
| L3MBTL3  | 0.780903  | 0.629988  | 0.9679702 | 0.0240034 | 0.0003918 |
| L3MBTL4  | 0.6917763 | 0.5541043 | 0.8636542 | 0.0011354 | 0.0001554 |
| LAS1L    | 0.8220562 | 0.5808057 | 1.1635154 | 0.2689358 | 0.0022072 |
| LBR      | 0.8640683 | 0.7302771 | 1.0223708 | 0.0887176 | 5.98E-05  |
| LEO1     | 0.6793502 | 0.5399686 | 0.8547102 | 0.0009669 | 5.10E-05  |
| LMNA     | 0.9515728 | 0.7923485 | 1.1427935 | 0.5952036 | 0.0152056 |
| LMNB1    | 1.3101953 | 1.0794821 | 1.5902179 | 0.0062596 | 9.38E-09  |
| LMNB2    | 1.270077  | 0.9914871 | 1.6269455 | 0.0584515 | 0.0001956 |
| MAP3K7   | 0.9257573 | 0.7038592 | 1.2176106 | 0.58112   | 0.0740598 |
| MAPKAPK3 | 0.6877096 | 0.5422674 | 0.8721611 | 0.0020135 | 9.26E-05  |
| MASTL    | 0.9147385 | 0.7032629 | 1.1898061 | 0.5064576 | 0.0255317 |
| MAX      | 0.792055  | 0.5773569 | 1.0865917 | 0.1484141 | 0.005492  |
| MAZ      | 0.9863363 | 0.791299  | 1.2294458 | 0.9025905 | 0.011754  |
| MBD1     | 0.7848737 | 0.6147428 | 1.0020885 | 0.0519887 | 0.0025604 |
| MBD2     | 0.6958306 | 0.5512209 | 0.8783779 | 0.0022813 | 8.39E-06  |
| MBD3     | 1.1545495 | 0.8778315 | 1.5184971 | 0.3039779 | 0.0019084 |
| MBD4     | 0.9584915 | 0.7234199 | 1.2699483 | 0.7677563 | 0.0383405 |
| MBD5     | 0.6171946 | 0.4898843 | 0.77759   | 4.24E-05  | 2.39E-05  |
| MBD6     | 1.2021659 | 0.9276377 | 1.557939  | 0.163902  | 0.0549645 |
| MBIP     | 0.7720803 | 0.6353898 | 0.9381769 | 0.0092713 | 0.0009844 |
| MBTD1    | 0.821743  | 0.6663752 | 1.0133353 | 0.0663465 | 0.0062137 |
| MCRS1    | 0.9713676 | 0.6785582 | 1.3905293 | 0.8738915 | 0.0491413 |
| MDC1     | 0.8849934 | 0.7191531 | 1.0890773 | 0.2485062 | 0.0106437 |
| MDM2     | 0.7520036 | 0.6051458 | 0.9345011 | 0.0101389 | 4.58E-06  |
| MDM4     | 1.152206  | 0.9619148 | 1.3801416 | 0.1239625 | 0.0213949 |
| MECP2    | 0.5908785 | 0.4663623 | 0.74864   | 1.31E-05  | 8.49E-08  |

|         |           |           |           |           |           |
|---------|-----------|-----------|-----------|-----------|-----------|
| MEN1    | 0.9666156 | 0.6933633 | 1.3475558 | 0.8412453 | 0.0677661 |
| MGA     | 0.6472757 | 0.5185839 | 0.8079037 | 0.00012   | 1.24E-05  |
| MGMT    | 0.7729234 | 0.6197567 | 0.9639438 | 0.0222627 | 0.0025467 |
| MIER1   | 0.6921907 | 0.5604107 | 0.8549587 | 0.0006396 | 6.77E-06  |
| MIER2   | 1.0842544 | 0.8161275 | 1.4404707 | 0.5767689 | 0.1150048 |
| MIER3   | 0.7087707 | 0.568888  | 0.8830489 | 0.0021494 | 0.001517  |
| MLLT1   | 0.9345784 | 0.7130258 | 1.2249722 | 0.624062  | 0.021009  |
| MLLT10  | 0.7829196 | 0.6371759 | 0.9619999 | 0.0198809 | 0.000127  |
| MLLT3   | 0.7013013 | 0.5649954 | 0.8704912 | 0.0012918 | 5.10E-05  |
| MLLT6   | 0.8946049 | 0.7284479 | 1.0986619 | 0.2880538 | 0.0390536 |
| MOCS1   | 0.7879502 | 0.6594814 | 0.9414451 | 0.0086794 | 0.0004499 |
| MORF4   | 0.2810849 | 0.0932385 | 0.8473827 | 0.02419   | 0.0002808 |
| MORF4L1 | 0.6587944 | 0.5275372 | 0.8227098 | 0.000232  | 2.19E-06  |
| MORF4L2 | 0.7867876 | 0.5778301 | 1.0713092 | 0.1278591 | 1.37E-05  |
| MOV10   | 1.5860358 | 1.2247422 | 2.0539094 | 0.0004705 | 1.67E-05  |
| MSH6    | 0.840584  | 0.6734267 | 1.0492329 | 0.1247534 | 0.0043629 |
| MST1    | 1.0909837 | 0.9463241 | 1.2577568 | 0.2302124 | 0.0014973 |
| MTA1    | 1.0958082 | 0.8789594 | 1.366156  | 0.4160939 | 0.0435747 |
| MTA2    | 1.1167957 | 0.8132748 | 1.5335931 | 0.4948232 | 0.0049622 |
| MTA3    | 0.8098252 | 0.5911047 | 1.1094765 | 0.1891153 | 0.0272499 |
| MTF2    | 1.0814922 | 0.8238948 | 1.4196294 | 0.5724829 | 0.2381104 |
| MYBBP1A | 1.2446786 | 0.9428928 | 1.643055  | 0.1223671 | 0.0024507 |
| MYO1C   | 0.7377444 | 0.5894221 | 0.9233905 | 0.0079088 | 0.000325  |
| MYSM1   | 0.9575551 | 0.7944907 | 1.1540874 | 0.6488496 | 0.063907  |
| NAP1L1  | 1.0742947 | 0.8405996 | 1.3729593 | 0.56692   | 0.0003456 |
| NAP1L2  | 0.9239647 | 0.8175353 | 1.0442495 | 0.2053265 | 0.0127721 |
| NAP1L3  | 1.0428055 | 0.881611  | 1.2334729 | 0.6246779 | 0.179398  |
| NAP1L4  | 0.8199321 | 0.5568173 | 1.2073772 | 0.3146481 | 0.0226493 |
| NAP1L5  | 0.7574479 | 0.6135997 | 0.9350188 | 0.0097316 | 0.0001348 |
| NASP    | 1.2544494 | 0.9738414 | 1.6159135 | 0.0792963 | 0.039424  |
| NAT10   | 0.8966711 | 0.6566213 | 1.224479  | 0.4926709 | 0.0213945 |
| NBN     | 0.7678847 | 0.6402152 | 0.9210134 | 0.0044154 | 3.06E-05  |
| NCL     | 0.7775754 | 0.6282733 | 0.9623575 | 0.0207399 | 4.30E-05  |
| NCOA1   | 0.6560434 | 0.540664  | 0.7960452 | 1.94E-05  | 9.90E-06  |
| NCOA2   | 0.7393211 | 0.6191512 | 0.8828146 | 0.0008464 | 1.62E-05  |
| NCOA3   | 0.7267714 | 0.6049989 | 0.8730538 | 0.0006475 | 0.0001914 |
| NCOA4   | 0.6306996 | 0.5444397 | 0.7306263 | 8.12E-10  | 1.08E-10  |
| NCOA5   | 0.7131017 | 0.5582373 | 0.910928  | 0.0067941 | 0.0002193 |
| NCOA6   | 0.7372248 | 0.5804805 | 0.9362939 | 0.0124299 | 2.91E-05  |
| NCOA7   | 0.6991136 | 0.6045153 | 0.8085153 | 1.40E-06  | 5.19E-07  |
| NCOR1   | 0.6864722 | 0.5640645 | 0.8354436 | 0.0001739 | 1.44E-07  |
| NCOR2   | 1.0030842 | 0.8110043 | 1.2406568 | 0.9773471 | 0.0662322 |
| NEK6    | 0.8640226 | 0.7753601 | 0.9628237 | 0.0081505 | 2.12E-05  |
| NEK9    | 0.8254703 | 0.6579653 | 1.0356187 | 0.0974164 | 0.0011927 |
| NFRKB   | 0.8043154 | 0.6311325 | 1.0250199 | 0.0783716 | 0.0003656 |
| NFYB    | 0.9109578 | 0.6636736 | 1.2503797 | 0.5638448 | 0.0334476 |
| NFYC    | 0.5406222 | 0.3854292 | 0.7583035 | 0.0003672 | 8.76E-06  |
| NIPBL   | 0.7285811 | 0.5983483 | 0.8871595 | 0.0016237 | 3.73E-05  |
| NOC2L   | 0.889761  | 0.6888678 | 1.1492403 | 0.3710068 | 0.0134638 |
| NPAS2   | 1.3777325 | 1.1177489 | 1.6981872 | 0.002671  | 0.0002943 |
| NPM1    | 0.7182531 | 0.5870592 | 0.8787658 | 0.0013008 | 1.17E-05  |

|          |           |           |           |           |           |
|----------|-----------|-----------|-----------|-----------|-----------|
| NPM2     | 0.9692584 | 0.8145631 | 1.1533322 | 0.7248707 | 0.0773712 |
| NSD1     | 0.7277576 | 0.602532  | 0.8790091 | 0.0009719 | 1.27E-05  |
| OGT      | 1.1936875 | 0.9920438 | 1.4363176 | 0.0607444 | 0.0049272 |
| PADI1    | 1.0967902 | 1.0048962 | 1.1970875 | 0.0385119 | 0.0001064 |
| PADI2    | 1.0792426 | 0.9345158 | 1.2463831 | 0.2992438 | 0.0327351 |
| PADI3    | 1.1953967 | 1.0916176 | 1.309042  | 0.0001173 | 2.51E-07  |
| PADI4    | 0.9090577 | 0.6353476 | 1.3006831 | 0.6019098 | 0.1932302 |
| PAF1     | 0.6934411 | 0.514388  | 0.9348207 | 0.016295  | 0.0004971 |
| PAK2     | 0.7663578 | 0.6129398 | 0.9581762 | 0.0195527 | 0.0012801 |
| PARG     | 0.7300084 | 0.5727914 | 0.9303776 | 0.0109861 | 0.0010841 |
| PARP1    | 0.8449231 | 0.6877127 | 1.0380718 | 0.1086605 | 0.0006153 |
| PARP2    | 1.0645277 | 0.8149675 | 1.3905085 | 0.6463885 | 0.0851678 |
| PARP3    | 1.1263547 | 0.8812164 | 1.4396859 | 0.342024  | 0.0386562 |
| PARP4    | 0.7446323 | 0.6383162 | 0.8686561 | 0.0001759 | 7.58E-08  |
| PAXIP1   | 0.7884525 | 0.6008223 | 1.0346776 | 0.0865075 | 0.0008203 |
| PBK      | 1.3680129 | 1.1382582 | 1.6441431 | 0.0008365 | 8.90E-05  |
| PCGF1    | 1.094845  | 0.7787846 | 1.5391747 | 0.6021055 | 0.1019412 |
| PCGF2    | 0.9514744 | 0.7582781 | 1.1938938 | 0.6675175 | 0.0306867 |
| PCGF3    | 1.1036814 | 0.8626846 | 1.4120024 | 0.4325429 | 0.0548519 |
| PCGF5    | 0.6160642 | 0.5107806 | 0.7430492 | 4.06E-07  | 2.12E-08  |
| PCGF6    | 1.0571276 | 0.7958671 | 1.4041523 | 0.701299  | 0.0013426 |
| PCNA     | 0.9183989 | 0.6924888 | 1.2180074 | 0.5545772 | 0.0001615 |
| PELP1    | 1.0141206 | 0.7361068 | 1.3971352 | 0.9316456 | 0.0468312 |
| PES1     | 0.7360535 | 0.5739225 | 0.943986  | 0.0157763 | 0.0004038 |
| PHC1     | 0.8771496 | 0.720282  | 1.0681807 | 0.1922779 | 0.0072349 |
| PHC2     | 0.955203  | 0.7456761 | 1.2236045 | 0.7167938 | 0.0316386 |
| PHC3     | 0.7672779 | 0.6326313 | 0.930582  | 0.0071296 | 0.0010308 |
| PHF1     | 0.8960122 | 0.6976294 | 1.1508086 | 0.3898383 | 0.0322555 |
| PHF10    | 0.8419237 | 0.6785051 | 1.0447019 | 0.1181054 | 0.0127385 |
| PHF12    | 1.1094059 | 0.8265188 | 1.489115  | 0.4893699 | 0.1959873 |
| PHF13    | 0.9466083 | 0.7530089 | 1.1899824 | 0.6383456 | 0.0129136 |
| PHF14    | 0.7599744 | 0.5650543 | 1.0221337 | 0.069496  | 0.0016988 |
| PHF19    | 1.4083728 | 1.0917277 | 1.8168577 | 0.0084044 | 0.0001074 |
| PHF2     | 0.7353304 | 0.5972178 | 0.9053829 | 0.0037747 | 9.55E-05  |
| PHF20    | 0.7294156 | 0.5696394 | 0.9340069 | 0.0123781 | 0.0003486 |
| PHF20L1  | 0.7908959 | 0.5924593 | 1.0557964 | 0.1114764 | 0.0126571 |
| PHF21A   | 1.3033868 | 0.9799614 | 1.7335552 | 0.0686282 | 0.0137592 |
| PHF21B   | 1.2945919 | 0.954356  | 1.7561247 | 0.0969826 | 0.001809  |
| PHF23    | 0.6961299 | 0.5239228 | 0.9249393 | 0.0124865 | 0.0012565 |
| PHF3     | 0.7329647 | 0.6242559 | 0.8606044 | 0.000149  | 4.95E-06  |
| PHF6     | 0.79933   | 0.6349259 | 1.006304  | 0.0565887 | 0.0001694 |
| PHF7     | 0.8835413 | 0.6375157 | 1.2245113 | 0.4571244 | 0.203862  |
| PHF8     | 0.8565554 | 0.6733463 | 1.0896135 | 0.2073056 | 0.0149764 |
| PHIP     | 0.9671443 | 0.7823099 | 1.1956492 | 0.7575379 | 0.0520407 |
| PIWIL4   | 1.0976561 | 0.8703312 | 1.3843567 | 0.4312978 | 0.0630811 |
| PKN1     | 0.8648246 | 0.6824468 | 1.0959414 | 0.2294317 | 0.0072409 |
| POGZ     | 1.0039592 | 0.8076165 | 1.2480354 | 0.9716112 | 0.0436361 |
| POLE3    | 0.6435565 | 0.5105993 | 0.8111351 | 0.0001894 | 1.88E-06  |
| PPARGC1A | 0.6968131 | 0.614662  | 0.789944  | 1.66E-08  | 2.45E-11  |
| PPM1G    | 0.9521069 | 0.6897467 | 1.3142615 | 0.7653957 | 0.0123545 |
| PPP2CA   | 0.613511  | 0.4608734 | 0.8167011 | 0.0008163 | 4.22E-05  |



|         |           |           |           |           |           |
|---------|-----------|-----------|-----------|-----------|-----------|
| PPP4C   | 1.1307853 | 0.8082566 | 1.5820167 | 0.4731099 | 0.0764538 |
| PPP4R2  | 0.752163  | 0.5792789 | 0.9766438 | 0.0325718 | 0.0004922 |
| PRC1    | 1.427308  | 1.1436893 | 1.7812602 | 0.001645  | 5.31E-06  |
| PRDM1   | 0.7915417 | 0.6821867 | 0.9184263 | 0.0020581 | 0.0006797 |
| PRDM10  | 0.6531279 | 0.5006765 | 0.8519994 | 0.0016839 | 0.0002477 |
| PRDM11  | 0.6662719 | 0.4988889 | 0.8898138 | 0.0059443 | 0.0002482 |
| PRDM12  | 3.1710147 | 1.4868224 | 6.7629692 | 0.0028232 | 7.68E-07  |
| PRDM13  | 6.4311191 | 0.2609141 | 158.51691 | 0.2550135 | 0.0015905 |
| PRDM14  | 1.196052  | 0.7270923 | 1.9674812 | 0.480827  | 0.0018268 |
| PRDM15  | 1.1774054 | 0.8131431 | 1.7048455 | 0.3871895 | 0.1077285 |
| PRDM16  | 0.6186415 | 0.4706097 | 0.8132373 | 0.0005786 | 5.51E-05  |
| PRDM2   | 0.7450587 | 0.5903316 | 0.9403401 | 0.0132158 | 0.0003676 |
| PRDM4   | 0.7045858 | 0.5645347 | 0.879381  | 0.0019563 | 0.0001149 |
| PRDM5   | 0.7971608 | 0.5650673 | 1.1245835 | 0.1966296 | 0.027514  |
| PRDM7   | 2.0785897 | 0.7882338 | 5.4812863 | 0.1391478 | 0.0001441 |
| PRDM8   | 1.3179845 | 1.0978436 | 1.5822683 | 0.0030657 | 0.0007791 |
| PRDM9   | 1.4126955 | 0.5262082 | 3.7926215 | 0.4929034 | 0.0002468 |
| PRKAA1  | 0.6786112 | 0.5621536 | 0.8191944 | 5.43E-05  | 1.09E-06  |
| PRKAA2  | 0.6273446 | 0.542063  | 0.7260434 | 3.99E-10  | 1.68E-08  |
| PRKAB1  | 0.6951941 | 0.5673187 | 0.851893  | 0.0004557 | 0.0001372 |
| PRKAB2  | 0.758989  | 0.626264  | 0.9198425 | 0.0049245 | 0.000618  |
| PRKAG1  | 0.5782477 | 0.4370848 | 0.7650012 | 0.0001251 | 6.94E-06  |
| PRKAG2  | 0.6795892 | 0.5329012 | 0.8666552 | 0.0018485 | 0.0002888 |
| PRKAG3  | 1.1668912 | 0.573012  | 2.3762765 | 0.67058   | 0.0054205 |
| PRKCA   | 0.9608426 | 0.8090565 | 1.1411051 | 0.6488723 | 0.0671126 |
| PRKCD   | 0.9406485 | 0.7429695 | 1.1909233 | 0.6112238 | 0.0205709 |
| PRKDC   | 0.8311409 | 0.6994562 | 0.9876176 | 0.035594  | 0.0001671 |
| PRMT1   | 1.1205408 | 0.7791381 | 1.6115393 | 0.5393026 | 0.0023794 |
| PRMT2   | 0.7458697 | 0.5838529 | 0.9528455 | 0.018949  | 0.0007474 |
| PRMT3   | 0.9530866 | 0.7079192 | 1.2831608 | 0.7514808 | 0.0041119 |
| PRMT5   | 0.7409156 | 0.6355695 | 0.863723  | 0.000127  | 5.30E-05  |
| PRMT6   | 0.7516712 | 0.608518  | 0.9285009 | 0.008093  | 0.0008213 |
| PRMT7   | 0.8903055 | 0.6219157 | 1.2745199 | 0.52558   | 0.2324753 |
| PRMT8   | 0.9114068 | 0.3869372 | 2.1467629 | 0.8319324 | 0.0654555 |
| PRPF31  | 0.9871966 | 0.6973809 | 1.3974532 | 0.9420673 | 0.0166472 |
| PRR12   | 0.8831851 | 0.7015724 | 1.1118111 | 0.2902443 | 0.0246021 |
| PRR14   | 0.9852811 | 0.7432024 | 1.3062108 | 0.9179036 | 0.0810204 |
| PSIP1   | 0.6879694 | 0.5653002 | 0.8372576 | 0.0001895 | 0.0001666 |
| PYG01   | 1.3084373 | 1.0366955 | 1.6514087 | 0.0236123 | 0.0034912 |
| PYG02   | 1.2781666 | 0.8996276 | 1.8159845 | 0.1707918 | 0.1277424 |
| RAC3    | 1.3534186 | 1.174296  | 1.559864  | 2.94E-05  | 8.85E-05  |
| RAD51   | 1.3577202 | 1.0670755 | 1.7275293 | 0.0128392 | 3.37E-06  |
| RAD54B  | 1.3749454 | 1.0797384 | 1.7508637 | 0.0098203 | 0.0016944 |
| RAD54L  | 1.3244747 | 1.1220802 | 1.5633759 | 0.0008959 | 9.27E-05  |
| RAD54L2 | 0.7277842 | 0.5635548 | 0.939873  | 0.0148833 | 0.0001037 |
| RAG1    | 0.4723475 | 0.3629029 | 0.6147984 | 2.44E-08  | 2.39E-08  |
| RAG2    | 2.5454595 | 0.3121097 | 20.759895 | 0.3829122 | 0.0070199 |
| RAI1    | 0.89773   | 0.7333831 | 1.0989061 | 0.2956749 | 0.0281511 |
| RARA    | 0.8756386 | 0.7289479 | 1.0518486 | 0.1557215 | 0.0002543 |
| RB1     | 0.7095467 | 0.6058176 | 0.8310364 | 2.09E-05  | 1.96E-09  |
| RBBP4   | 0.7816028 | 0.6162789 | 0.9912768 | 0.0421311 | 0.0003073 |

|         |           |           |           |           |           |
|---------|-----------|-----------|-----------|-----------|-----------|
| RBBP5   | 0.6107855 | 0.478382  | 0.779835  | 7.66E-05  | 8.45E-05  |
| RBBP7   | 0.8710212 | 0.637601  | 1.1898946 | 0.3856163 | 0.0078983 |
| RBP1    | 1.1192442 | 0.9415357 | 1.3304939 | 0.2015858 | 0.0117327 |
| RBX1    | 1.1398191 | 0.7986083 | 1.6268146 | 0.4709082 | 0.0076839 |
| RCC1    | 1.3506548 | 1.0808755 | 1.6877691 | 0.0081918 | 8.33E-05  |
| RCOR1   | 0.755635  | 0.6238016 | 0.9153299 | 0.0041783 | 6.54E-05  |
| RCOR2   | 1.3771206 | 1.1605486 | 1.6341074 | 0.0002468 | 2.60E-05  |
| RCOR3   | 0.8746005 | 0.6973765 | 1.0968624 | 0.2461581 | 0.0247003 |
| REST    | 0.6393747 | 0.5257774 | 0.7775152 | 7.41E-06  | 4.44E-06  |
| RING1   | 0.8614282 | 0.6687372 | 1.1096415 | 0.2482383 | 0.0132061 |
| RIT1    | 0.7456164 | 0.6436211 | 0.8637751 | 9.19E-05  | 2.62E-08  |
| RMI1    | 0.6972193 | 0.5507104 | 0.8827049 | 0.0027301 | 4.53E-05  |
| RNF168  | 0.7667881 | 0.6123338 | 0.9602016 | 0.0206765 | 0.0009149 |
| RNF17   | 1.3037866 | 0.9487904 | 1.791607  | 0.10188   | 0.0113331 |
| RNF2    | 0.7724789 | 0.6161863 | 0.9684144 | 0.0252055 | 0.0016303 |
| RNF20   | 0.6085901 | 0.5131566 | 0.7217717 | 1.15E-08  | 2.12E-08  |
| RNF40   | 0.7146583 | 0.597554  | 0.8547119 | 0.0002339 | 2.20E-05  |
| RNF8    | 0.6569849 | 0.4941736 | 0.8734363 | 0.0038364 | 1.41E-05  |
| RPS6KA3 | 0.7749283 | 0.6532201 | 0.9193131 | 0.0034442 | 0.000123  |
| RPS6KA4 | 1.2269947 | 0.9154345 | 1.6445918 | 0.1710717 | 0.0189849 |
| RPS6KA5 | 0.5323552 | 0.3627211 | 0.7813222 | 0.0012795 | 9.10E-05  |
| RSAD1   | 0.9115621 | 0.6619758 | 1.2552505 | 0.5705375 | 0.0950683 |
| RSF1    | 0.6666778 | 0.5429449 | 0.8186085 | 0.0001085 | 6.02E-05  |
| RTF1    | 0.6997264 | 0.5314388 | 0.9213048 | 0.0109616 | 0.002595  |
| RUVBL1  | 0.9448549 | 0.6845731 | 1.3040987 | 0.730082  | 0.0134455 |
| RUVBL2  | 1.2421762 | 0.8784107 | 1.7565834 | 0.2199479 | 0.0270582 |
| RYBP    | 0.6380845 | 0.5102853 | 0.7978904 | 8.15E-05  | 1.58E-05  |
| SAFB    | 0.9099185 | 0.6905825 | 1.1989178 | 0.5023449 | 0.0446196 |
| SAP130  | 0.8053351 | 0.6362986 | 1.0192772 | 0.0716845 | 0.0017794 |
| SAP18   | 0.4976981 | 0.3757185 | 0.6592793 | 1.15E-06  | 2.99E-07  |
| SAP30   | 0.9813094 | 0.8256224 | 1.1663543 | 0.8304978 | 0.0146588 |
| SAP30L  | 0.6111661 | 0.5072272 | 0.7364038 | 2.25E-07  | 6.88E-11  |
| SATB1   | 0.7187355 | 0.5874255 | 0.8793979 | 0.0013342 | 5.15E-05  |
| SATB2   | 0.7558388 | 0.6447516 | 0.8860657 | 0.0005577 | 4.71E-07  |
| SCMH1   | 0.7884851 | 0.6181797 | 1.0057087 | 0.0556057 | 0.004934  |
| SCML1   | 1.1199675 | 0.9183697 | 1.3658193 | 0.2631569 | 0.0289363 |
| SCML2   | 1.4524444 | 1.0337859 | 2.0406497 | 0.031437  | 0.0058223 |
| SCML4   | 1.1730303 | 0.8411426 | 1.6358704 | 0.3469677 | 0.0204965 |
| SENP1   | 0.8526708 | 0.6529307 | 1.1135141 | 0.2418406 | 0.0048719 |
| SENP3   | 0.8960809 | 0.643637  | 1.2475369 | 0.5157429 | 0.0166888 |
| SET     | 0.6769916 | 0.5342499 | 0.8578712 | 0.0012429 | 9.62E-06  |
| SETBP1  | 0.6797516 | 0.5722921 | 0.8073888 | 1.10E-05  | 4.58E-08  |
| SETD1A  | 1.0190819 | 0.7787361 | 1.3336071 | 0.8904531 | 0.0430981 |
| SETD2   | 0.7420581 | 0.6068776 | 0.9073498 | 0.0036426 | 9.06E-05  |
| SETD3   | 0.529074  | 0.4284866 | 0.6532743 | 3.27E-09  | 2.33E-07  |
| SETD4   | 1.4771237 | 1.0753062 | 2.0290914 | 0.0160324 | 0.0001212 |
| SETD5   | 1.076451  | 0.864465  | 1.3404207 | 0.5103007 | 0.2005651 |
| SETD6   | 1.3112523 | 0.946453  | 1.8166593 | 0.1032902 | 0.0060199 |
| SETD7   | 0.8067697 | 0.6841288 | 0.951396  | 0.0107045 | 0.001248  |
| SETDB1  | 0.8525412 | 0.667866  | 1.0882819 | 0.2002731 | 0.0052765 |
| SETDB2  | 0.6043464 | 0.4624196 | 0.7898338 | 0.0002265 | 3.40E-05  |

|         |           |           |           |           |           |
|---------|-----------|-----------|-----------|-----------|-----------|
| SETMAR  | 0.7068999 | 0.5359329 | 0.9324068 | 0.0140737 | 0.0027935 |
| SF3B1   | 0.7949777 | 0.6416021 | 0.9850177 | 0.0359054 | 0.0014851 |
| SF3B3   | 0.7388252 | 0.5950639 | 0.9173178 | 0.0061135 | 0.0005096 |
| SFMBT1  | 0.7092712 | 0.5668327 | 0.8875028 | 0.0026699 | 0.0007378 |
| SFMBT2  | 0.9058385 | 0.7514783 | 1.0919057 | 0.2994912 | 0.012302  |
| SFPQ    | 0.9281895 | 0.724907  | 1.1884777 | 0.5546168 | 0.1079243 |
| SHPRH   | 0.634459  | 0.5038372 | 0.7989449 | 0.0001095 | 0.0001259 |
| SIN3A   | 0.6742933 | 0.5396551 | 0.8425224 | 0.0005247 | 5.35E-05  |
| SIN3B   | 1.0758695 | 0.8462009 | 1.3678728 | 0.5505787 | 0.0748624 |
| SIRT1   | 0.6666963 | 0.555778  | 0.799751  | 1.26E-05  | 8.16E-07  |
| SIRT2   | 0.6050625 | 0.4345203 | 0.8425397 | 0.0029373 | 0.0002008 |
| SIRT3   | 0.5981298 | 0.4466154 | 0.8010455 | 0.0005639 | 8.88E-08  |
| SIRT4   | 0.63074   | 0.4748033 | 0.8378899 | 0.0014696 | 0.0018603 |
| SIRT5   | 0.6045039 | 0.4620736 | 0.7908372 | 0.0002409 | 0.0001131 |
| SIRT6   | 1.383018  | 0.9718095 | 1.9682239 | 0.0716821 | 0.0155499 |
| SIRT7   | 2.1169596 | 1.5263482 | 2.9361047 | 7.00E-06  | 5.33E-08  |
| SMARCA1 | 0.733575  | 0.6178883 | 0.8709216 | 0.0004027 | 0.0003469 |
| SMARCA2 | 0.6436252 | 0.5454392 | 0.759486  | 1.81E-07  | 7.19E-07  |
| SMARCA4 | 0.8889132 | 0.6804414 | 1.1612559 | 0.3878218 | 0.0164446 |
| SMARCA5 | 0.6527605 | 0.5327913 | 0.7997433 | 3.84E-05  | 3.38E-06  |
| SMARCA1 | 0.6969588 | 0.5682312 | 0.8548483 | 0.0005297 | 6.15E-05  |
| SMARCA1 | 0.7311491 | 0.5624551 | 0.9504384 | 0.0192949 | 0.0014573 |
| SMARCB1 | 0.6688021 | 0.5240499 | 0.8535376 | 0.0012268 | 1.77E-05  |
| SMARCC1 | 0.7443053 | 0.6016131 | 0.9208415 | 0.0065403 | 0.0006343 |
| SMARCC2 | 0.8341065 | 0.6928953 | 1.0040963 | 0.0552675 | 0.0120551 |
| SMARCD1 | 1.1336803 | 0.8171342 | 1.5728517 | 0.4526125 | 0.1165057 |
| SMARCD2 | 1.0100209 | 0.7601669 | 1.3419976 | 0.945175  | 0.0120668 |
| SMARCD3 | 1.3437746 | 1.1139636 | 1.6209956 | 0.0020167 | 0.0003419 |
| SMARCE1 | 0.7666656 | 0.5731225 | 1.0255681 | 0.0734713 | 0.0012573 |
| SMC1A   | 0.8015085 | 0.6673941 | 0.9625735 | 0.0178726 | 0.002483  |
| SMCHD1  | 0.8205584 | 0.6736677 | 0.999478  | 0.0493967 | 0.0012106 |
| SMYD1   | 25.327515 | 1.1200148 | 572.74514 | 0.0422349 | 0.0040097 |
| SMYD2   | 0.623932  | 0.4906853 | 0.7933621 | 0.0001189 | 2.18E-05  |
| SMYD3   | 1.0817208 | 0.7882206 | 1.4845081 | 0.6266818 | 0.0158182 |
| SMYD4   | 0.8074184 | 0.6060262 | 1.0757364 | 0.1439446 | 0.000665  |
| SMYD5   | 0.8221752 | 0.6019912 | 1.1228937 | 0.2182648 | 0.0537957 |
| SNAI2   | 1.0939754 | 0.9470639 | 1.2636764 | 0.2221811 | 0.0868205 |
| SND1    | 0.7487983 | 0.5807622 | 0.9654536 | 0.0256736 | 5.98E-05  |
| SP1     | 0.7969829 | 0.6488746 | 0.9788975 | 0.0305188 | 5.03E-05  |
| SP100   | 0.8829671 | 0.6668674 | 1.1690945 | 0.3847967 | 0.0311149 |
| SP110   | 0.9277561 | 0.6996503 | 1.2302308 | 0.6024887 | 0.0723581 |
| SP140   | 1.2573493 | 1.0466988 | 1.5103936 | 0.0143724 | 0.002853  |
| SPEN    | 0.8019461 | 0.6837626 | 0.9405567 | 0.0066606 | 8.79E-06  |
| SPOP    | 0.6859941 | 0.5286595 | 0.8901531 | 0.0045773 | 0.0003845 |
| SRCAP   | 0.8174651 | 0.6328209 | 1.0559849 | 0.1228453 | 0.0021612 |
| SRRM2   | 1.0302082 | 0.8654328 | 1.2263563 | 0.7378661 | 0.3117313 |
| SS18L1  | 1.020687  | 0.7818597 | 1.3324666 | 0.8803244 | 0.1454159 |
| SS18L2  | 1.6303965 | 1.0999936 | 2.416553  | 0.0149067 | 0.0030163 |
| SSRP1   | 0.7601217 | 0.5961346 | 0.969219  | 0.0269582 | 0.002043  |
| STK31   | 1.6824078 | 1.2482416 | 2.2675865 | 0.0006356 | 4.40E-07  |
| STK4    | 0.921055  | 0.7233691 | 1.1727656 | 0.5046895 | 0.0053635 |

|         |           |           |           |           |           |
|---------|-----------|-----------|-----------|-----------|-----------|
| SUDS3   | 0.9390063 | 0.7031278 | 1.254015  | 0.6698263 | 0.0165484 |
| SUPT16H | 0.7696115 | 0.6222792 | 0.9518264 | 0.01572   | 0.0013386 |
| SUPT3H  | 0.7681624 | 0.5818675 | 1.0141029 | 0.0627239 | 0.0101064 |
| SUPT6H  | 0.7340938 | 0.5974806 | 0.9019434 | 0.003258  | 2.07E-05  |
| SUPT7L  | 1.1001884 | 0.8055702 | 1.5025563 | 0.5482317 | 0.3062186 |
| SUV39H1 | 1.2889258 | 0.9347261 | 1.7773438 | 0.1215717 | 0.0464882 |
| SUV39H2 | 0.8814293 | 0.6588926 | 1.1791264 | 0.3952653 | 0.0008548 |
| SUZ12   | 0.6974585 | 0.5579382 | 0.8718679 | 0.0015559 | 3.29E-05  |
| SYNCRIP | 0.8078352 | 0.6506487 | 1.0029956 | 0.0532521 | 0.0006106 |
| TAF1    | 0.8574024 | 0.7017663 | 1.0475551 | 0.1322285 | 0.0037878 |
| TAF10   | 2.2749982 | 1.7427893 | 2.9697318 | 1.49E-09  | 6.55E-08  |
| TAF12   | 0.9505785 | 0.6719851 | 1.3446721 | 0.7745578 | 0.0008031 |
| TAF1L   | 0.7148029 | 0.0835927 | 6.1122955 | 0.759121  | 0.164236  |
| TAF2    | 0.7791904 | 0.637851  | 0.9518487 | 0.0145572 | 8.35E-06  |
| TAF4    | 0.948923  | 0.6553891 | 1.373924  | 0.7812844 | 0.0092635 |
| TAF5    | 0.8240704 | 0.6126929 | 1.1083727 | 0.2006999 | 0.0257338 |
| TAF5L   | 0.8391694 | 0.6508382 | 1.0819976 | 0.1763094 | 0.0135194 |
| TAF6    | 0.9084445 | 0.7073389 | 1.1667271 | 0.4519784 | 0.0072016 |
| TAF6L   | 1.0909995 | 0.7874067 | 1.5116456 | 0.6006567 | 0.0672344 |
| TAF7    | 0.8043978 | 0.6437955 | 1.0050641 | 0.0554275 | 0.0093417 |
| TAF9    | 0.66017   | 0.4812376 | 0.9056325 | 0.0100387 | 6.35E-05  |
| TAF9B   | 0.715052  | 0.5817815 | 0.8788511 | 0.0014371 | 5.88E-06  |
| TBL1XR1 | 0.9554803 | 0.763855  | 1.1951778 | 0.6900628 | 0.2371819 |
| TCF4    | 0.7700409 | 0.6725986 | 0.8816    | 0.0001534 | 1.32E-05  |
| TDG     | 1.1788662 | 0.8737935 | 1.5904506 | 0.2814875 | 0.0061058 |
| TDRD1   | 0.7982327 | 0.575289  | 1.1075746 | 0.1774811 | 0.0075757 |
| TDRD3   | 0.6567845 | 0.5058922 | 0.8526834 | 0.0015964 | 1.09E-05  |
| TDRD5   | 0.9210877 | 0.6655123 | 1.2748111 | 0.6200895 | 0.0147537 |
| TDRD7   | 0.5772579 | 0.4722765 | 0.7055755 | 8.08E-08  | 1.15E-08  |
| TDRD9   | 0.9072332 | 0.7801642 | 1.0549986 | 0.2060344 | 0.019817  |
| TDRKH   | 0.74892   | 0.5725687 | 0.9795876 | 0.0348144 | 9.39E-05  |
| TERF1   | 0.773505  | 0.605395  | 0.9882969 | 0.0399641 | 0.0020796 |
| TERF2   | 0.7003348 | 0.5421666 | 0.9046461 | 0.0063867 | 0.000142  |
| TEX10   | 0.6666028 | 0.5118259 | 0.8681845 | 0.0026251 | 0.0005718 |
| TFDP1   | 0.6508207 | 0.5292403 | 0.8003313 | 4.68E-05  | 1.12E-05  |
| TFF1    | 1.1720566 | 1.0560491 | 1.3008076 | 0.0028312 | 3.71E-08  |
| TFPT    | 1.1359011 | 0.8653194 | 1.4910927 | 0.3586596 | 0.0008762 |
| TLE1    | 0.7697034 | 0.615585  | 0.9624069 | 0.0216707 | 0.0070811 |
| TLE2    | 0.7802009 | 0.6618852 | 0.9196661 | 0.0030964 | 0.0005701 |
| TLE4    | 0.7844638 | 0.6014426 | 1.0231789 | 0.0733071 | 0.0003966 |
| TLK1    | 0.7704146 | 0.5875919 | 1.0101204 | 0.0591456 | 0.0004005 |
| TLK2    | 0.6777527 | 0.5069984 | 0.9060161 | 0.0086297 | 0.00255   |
| TNP1    | 4.4451284 | 1.0573258 | 18.68787  | 0.0417461 | 0.0045867 |
| TNP2    | 0.7790758 | 0.0254363 | 23.861898 | 0.8862987 | 0.0499659 |
| TOP2A   | 1.2941461 | 1.1079411 | 1.5116455 | 0.0011411 | 7.11E-06  |
| TOP2B   | 0.7298305 | 0.6011336 | 0.8860802 | 0.001463  | 0.0001177 |
| TOPBP1  | 0.9455583 | 0.7560173 | 1.1826192 | 0.6238187 | 0.057196  |
| TOX     | 1.0108988 | 0.8896049 | 1.1487307 | 0.8679844 | 0.1474652 |
| TP53    | 0.9171824 | 0.7148867 | 1.1767229 | 0.4965228 | 0.0228906 |
| TP53BP1 | 0.7884353 | 0.6475084 | 0.9600343 | 0.0179855 | 0.0002117 |
| TRIM16  | 1.1241553 | 0.8494846 | 1.4876374 | 0.4129302 | 2.75E-05  |

|        |           |           |           |           |           |
|--------|-----------|-----------|-----------|-----------|-----------|
| TRIM24 | 0.6291771 | 0.4871008 | 0.812694  | 0.0003879 | 8.62E-06  |
| TRIM28 | 0.9279148 | 0.6982056 | 1.2331981 | 0.60617   | 0.0096886 |
| TRIM33 | 0.7109534 | 0.5621425 | 0.8991577 | 0.0044124 | 3.37E-05  |
| TRRAP  | 0.8079735 | 0.6619997 | 0.986135  | 0.0359675 | 0.0004408 |
| TSPYL1 | 0.622574  | 0.5354856 | 0.723826  | 7.10E-10  | 1.59E-09  |
| TSPYL2 | 1.1057539 | 0.9449046 | 1.2939843 | 0.2100666 | 0.0387691 |
| TSPYL4 | 0.676338  | 0.5623565 | 0.8134219 | 3.28E-05  | 3.51E-07  |
| TSPYL5 | 0.7387737 | 0.63067   | 0.8654075 | 0.0001763 | 1.00E-06  |
| TSPYL6 | 1.152411  | 0.3884454 | 3.418887  | 0.7982039 | 0.0004591 |
| TSSK6  | 1.0048973 | 0.7779105 | 1.2981166 | 0.9701675 | 0.0800999 |
| TTF2   | 1.0139197 | 0.7458627 | 1.3783141 | 0.9296835 | 0.1160017 |
| TTK    | 1.7687733 | 1.4130903 | 2.2139838 | 6.40E-07  | 3.47E-09  |
| TXN2   | 0.6404293 | 0.4565451 | 0.8983772 | 0.0098641 | 0.0038116 |
| UBE2A  | 0.8813366 | 0.638718  | 1.2161144 | 0.4419408 | 0.0017604 |
| UBE2B  | 0.6389577 | 0.495978  | 0.8231552 | 0.0005287 | 1.32E-05  |
| UBE2D1 | 0.999311  | 0.7604387 | 1.313219  | 0.9960544 | 8.28E-05  |
| UBE2D3 | 0.50582   | 0.3988907 | 0.6414135 | 1.86E-08  | 4.31E-10  |
| UBE2E1 | 0.8053928 | 0.6089809 | 1.0651526 | 0.1291598 | 0.0069989 |
| UBE2H  | 0.86354   | 0.6616351 | 1.1270583 | 0.2802691 | 0.01153   |
| UBE2N  | 0.7525432 | 0.5519037 | 1.0261233 | 0.0723411 | 0.0004107 |
| UBE2T  | 1.6667359 | 1.3614142 | 2.0405316 | 7.48E-07  | 1.04E-09  |
| UBN1   | 0.7927614 | 0.6400497 | 0.9819091 | 0.0334044 | 0.0009913 |
| UBR2   | 0.6784825 | 0.5537473 | 0.8313151 | 0.0001823 | 2.07E-06  |
| UBTF   | 0.8282278 | 0.6329215 | 1.0838016 | 0.1696006 | 0.0075783 |
| UHL5   | 0.6886543 | 0.5395207 | 0.8790113 | 0.0027392 | 1.26E-05  |
| UHRF1  | 1.4621684 | 1.2179022 | 1.7554254 | 4.63E-05  | 3.58E-06  |
| UHRF2  | 0.8676117 | 0.6923048 | 1.0873103 | 0.2175326 | 0.0121381 |
| USP11  | 0.858516  | 0.6806912 | 1.0827961 | 0.1976681 | 0.0069083 |
| USP12  | 0.7023611 | 0.5788313 | 0.8522538 | 0.0003438 | 4.97E-06  |
| USP15  | 0.9160625 | 0.6679642 | 1.2563106 | 0.5864219 | 0.0293453 |
| USP16  | 0.8257322 | 0.6551564 | 1.040719  | 0.1048237 | 0.001041  |
| USP21  | 1.4337953 | 1.0652591 | 1.9298298 | 0.0174539 | 0.0007015 |
| USP22  | 0.7610172 | 0.6252639 | 0.9262443 | 0.0064449 | 0.0001982 |
| USP3   | 0.7434485 | 0.5537647 | 0.9981057 | 0.0485434 | 0.0069364 |
| USP36  | 0.8689132 | 0.6823708 | 1.1064516 | 0.2544681 | 0.0144434 |
| USP44  | 0.4800235 | 0.2422822 | 0.9510502 | 0.0353931 | 0.0155535 |
| USP46  | 0.7163688 | 0.567882  | 0.9036813 | 0.0048847 | 0.0001748 |
| USP49  | 1.2921715 | 0.9613235 | 1.7368838 | 0.0893985 | 0.0320863 |
| USP7   | 0.632524  | 0.4897007 | 0.8170023 | 0.0004518 | 2.70E-05  |
| UTY    | 0.920009  | 0.8235706 | 1.0277402 | 0.1400358 | 0.0173327 |
| VDR    | 0.8736856 | 0.7499463 | 1.0178414 | 0.083094  | 0.0015407 |
| VPS72  | 0.66275   | 0.479161  | 0.9166805 | 0.0129318 | 0.0055503 |
| VRK1   | 0.7740756 | 0.5692139 | 1.0526677 | 0.1025286 | 0.0005553 |
| WAC    | 0.6593154 | 0.5392044 | 0.8061818 | 4.91E-05  | 2.16E-06  |
| WDR5   | 0.8277926 | 0.6503291 | 1.0536827 | 0.1247351 | 0.0207363 |
| WDR77  | 1.0490066 | 0.7314205 | 1.50449   | 0.7948356 | 0.0009239 |
| WSB2   | 0.8068203 | 0.6118189 | 1.0639735 | 0.1283437 | 0.0007619 |
| XRCC1  | 0.9584758 | 0.7144937 | 1.2857719 | 0.7772109 | 0.0454335 |
| YAF2   | 0.78874   | 0.5736074 | 1.0845585 | 0.1441709 | 0.0107946 |
| YEATS2 | 0.9742381 | 0.8033036 | 1.1815456 | 0.790891  | 0.0101627 |
| YEATS4 | 0.7063553 | 0.5675733 | 0.879072  | 0.0018408 | 7.40E-06  |

|         |           |           |           |           |           |
|---------|-----------|-----------|-----------|-----------|-----------|
| YWHAB   | 0.6295854 | 0.4943792 | 0.8017687 | 0.0001761 | 1.05E-05  |
| YWHAE   | 0.5567096 | 0.4212861 | 0.7356654 | 3.81E-05  | 1.61E-05  |
| YWHAZ   | 0.7942977 | 0.6021416 | 1.047775  | 0.103163  | 0.0004331 |
| YY1     | 0.6819882 | 0.5120799 | 0.908272  | 0.0088426 | 0.001809  |
| ZBTB16  | 0.6931749 | 0.607726  | 0.7906384 | 4.77E-08  | 2.42E-08  |
| ZBTB24  | 0.8158132 | 0.6335062 | 1.0505834 | 0.1146666 | 0.003435  |
| ZBTB33  | 0.6693156 | 0.545321  | 0.8215039 | 0.0001226 | 4.90E-06  |
| ZBTB38  | 0.8170504 | 0.6823062 | 0.9784042 | 0.0279921 | 0.0002794 |
| ZBTB4   | 0.6166459 | 0.5080381 | 0.7484717 | 1.00E-06  | 1.09E-07  |
| ZBTB7C  | 1.0876396 | 0.965005  | 1.2258589 | 0.1687105 | 0.005882  |
| ZCWPW1  | 1.360308  | 0.9710192 | 1.9056655 | 0.0736173 | 0.0002283 |
| ZGPAT   | 1.249276  | 0.963084  | 1.6205135 | 0.0936193 | 0.0122945 |
| ZHX1    | 0.6727566 | 0.5536302 | 0.8175158 | 6.71E-05  | 3.70E-06  |
| ZHX2    | 0.8704212 | 0.7305956 | 1.0370073 | 0.120364  | 0.0074592 |
| ZHX3    | 0.6871496 | 0.5676103 | 0.831864  | 0.0001192 | 6.27E-05  |
| ZMYM1   | 0.7743686 | 0.6002934 | 0.9989228 | 0.0490381 | 0.0008809 |
| ZMYM2   | 0.9572664 | 0.7417454 | 1.235409  | 0.7371866 | 0.0552226 |
| ZMYM3   | 0.9075169 | 0.7096093 | 1.1606202 | 0.4394146 | 0.021655  |
| ZMYM4   | 0.7718101 | 0.62085   | 0.9594764 | 0.0196752 | 4.93E-05  |
| ZMYM5   | 0.8470965 | 0.6557431 | 1.0942891 | 0.2040014 | 0.0058402 |
| ZMYM6   | 0.8965061 | 0.615067  | 1.3067245 | 0.5698207 | 0.129587  |
| ZMYND11 | 0.6325564 | 0.5264262 | 0.7600829 | 1.02E-06  | 1.06E-09  |
| ZNF217  | 0.780617  | 0.6310593 | 0.9656189 | 0.0224674 | 0.0006267 |
| ZNF516  | 0.7188158 | 0.5881627 | 0.878492  | 0.0012566 | 0.000349  |
| ZNF532  | 0.9547263 | 0.7988562 | 1.1410092 | 0.6104365 | 0.0394087 |
| ZNF541  | 0.9206211 | 0.7773173 | 1.0903439 | 0.3380369 | 0.0005773 |
| ZNF592  | 0.7119436 | 0.5805137 | 0.8731296 | 0.0011028 | 1.66E-05  |
| ZNF687  | 0.7367335 | 0.5948978 | 0.9123857 | 0.0051041 | 4.88E-05  |
| ZNF711  | 0.866689  | 0.7743112 | 0.9700877 | 0.0128436 | 0.0022356 |
| ZNHIT1  | 1.342214  | 1.032561  | 1.7447283 | 0.0278488 | 0.0013478 |
| ZRANB3  | 0.6560918 | 0.4449339 | 0.9674614 | 0.0334281 | 0.0010119 |
