# Supplementary material
Source: publisher figshare collection journal article supplement (https://future-science-group.figshare.com/articles/dataset/_/21205739)
Supplement: Supplementary file 1 [file 1]

| id | coef | HR | HR.95L | HR.95H | pvalue |
| --- | --- | --- | --- | --- | --- |
| AKAP6 | -0.49625883 | 0.756245 | 0.532687 | 1.0236987 | 0.014 |
| LOXL3 | 0.631578622 | 1.568523 | 1.235871 | 1.8698521 | 0.018 |
| FUCA1 | -0.38046953 | 0.786513 | 0.602324 | 0.9652359 | 0.019 |
| PDK4 | -0.17653205 | 0.579799 | 0.324047 | 0.7316497 | 0.025 |
| DMTF1 | 0.34384726 | 1.245679 | 0.9285652 | 1.5948754 | 0.030 |
| ATOH8 | -0.17323842 | 0.5698541 | 0.2659874 | 0.7546531 | 0.032 |
| NAPSA | -0.16509329 | 0.6456412 | 0.4657874 | 0.9632147 | 0.032 |
| HLA-DQB2 | -0.24506420 | 0.4567879 | 0.2478952 | 0.6987542 | 0.041 |
| LBP | 0.149814219 | 1.1465783 | 0.9654879 | 1.3656789 | 0.045 |
